# Supplementary material
Source: HighWire-hosted journal article supplement (https://www.ijssurgery.com/content/8304)
Supplement: inline-supplementary-material-1 [file inline-supplementary-material-1.docx]

Supplementary Table 1 Questionnaire Implemented in the VIBe Scale Validation Process to Document Participant Characteristics and Assess the Relevance and Clarity of the Scale

| **Question** | **Response Type** | **Available Responses** | **Question Tree** |
| --- | --- | --- | --- |
| What is your surgical specialty | Single-selection, multiple choice | Neurological, Orthopedic | N/A |
| What is your surgical subspecialty? | Multiple-selection, multiple choice | Deformity, Degenerative, Minimally Invasive, Trauma, Tumor | N/A |
| What is your anatomical focus? | Multiple-selection, multiple choice | Cervical, Thoracic, Lumbar, Sacral | N/A |
| Do you use hemostatic agents in your surgical practice? | Binary | Yes, No | N/A |
| For how many years have you practiced surgery? | Numerical free text | N/A | N/A |
| What percentage of your caseload is performed minimally invasive? | Numerical free text | N/A | N/A |
| What type of hospital setting do you practice within? | Multiple-selection, multiple choice | Academic, Private, Nonprofit | N/A |
| Would you be able to implement this scale for a clinical study? | Binary | Yes, No | If “No”, then why not? (Free text) |
| Is this scale relevant for evaluating hemostasis in clinical studies? | Binary | Yes, No | If “No”, then why not? (Free text) |
| Does the bleeding scale represent the range of bleeding- site sizes and severities expected in your clinical practice? | Binary | Yes, No | If “No”, then why not? (Free text) |
| Does the bleeding scale use objective terms? | Single-selection, multiple choice | Yes; No, but does not prevent me from using the scale; No, and prevents me from using the scale | Follow-up question to selecting either “No”: Which terms are non-objective? (Free text) |
| Does the bleeding scale use non-overlapping terms? | Single-selection, multiple choice | Yes; No, but does not prevent me from using the scale; No and prevents me from using the scale | Follow-up question to selecting either “No”: Which terms are overlapping? (Free text) |
| How self-explanatory is the bleeding scale? | Likert Agreement Scale | Very, Mostly, Not Really, Not at All | N/A |
| Did you use visual presentation of blood loss (eg, ooze, intermittent flow, controllable spurting, etc) to grade the videos? | Binary | Yes, No | N/A |
| Did you use anatomical appearance (eg, capillary-like, venule-like, arterial-like, etc) to grade the videos? | Binary | Yes, No | N/A |
| Did you use qualitative descriptions of bleeding (eg, mild, moderate, severe, etc) to grade the videos? | Binary | Yes, No | N/A |
| Did you use visually estimated rate of blood loss to grade the videos? | Binary | Yes, No | N/A |
| Which description is the most relevant to you? | Single-selection, multiple choice | Visual Presentation, Anatomical Appearance, Qualitative Description, Visually Estimated Rate of Blood Loss | N/A |
| Which description is the least relevant to you? | Single-selection, multiple choice | Visual Presentation, Anatomical Appearance, Qualitative Description, Visually Estimated Rate of Blood Loss | N/A |
| Would you be able to apply this bleeding scale to minimally invasive surgery (MIS)? | Single-selection, multiple choice | Yes, as is; Yes, with modifications; No; N/A (I don’t do MIS) | Follow-up question to selecting “Yes, with modifications”: What modifications are necessary? (Free text)  Follow-up question to selecting “No”: Why not? (Free text) |
| Is this scale relevant for evaluating intraoperative hemostasis? | Binary | Yes, as is; Yes, with modifications; No | Follow-up question to selecting “Yes, with modifications”: What modifications are necessary? (Free text)  Follow-up question to selecting “No”: Why not? (Free text) |
| Do you think the scale can be used to describe intra-operative bleeding when communicating with… | Multiple-selection, multiple choice | Other Surgeons, Surgical Physician Assistants, Registered Nurses, Anesthesiologists, Industry Representatives, None of the above | N/A |
| Can this scale be used to differentiate hemostatic agents? | Binary | Yes, No | Follow-up question to selecting “No”: How do you differentiate hemostatic agents? (Free text) |
| Do you have interest in participating in future clinical studies investigating hemostatic agents? | Binary | Yes, No | N/A |
| Do you have any additional thoughts not addressed above? | Free Text | N/A | N/A |
