# Supplementary material
Source: HighWire-hosted journal article supplement (https://www.ijssurgery.com/content/8304)
Supplement: inline-supplementary-material-2 [file inline-supplementary-material-2.docx]

Supplementary Table 2 Frequency Distribution of Participants’ Response to Clarity and Relevance of the VIBe Scale – Neurosurgery and Orthopedic Surgery Combined

| **Question / Response** | **N** | **%** |
| --- | --- | --- |
| Would you be able to implement this scale for a clinical study? |  |  |
| Yes | 25 | 100 |
| No | 0 | 0 |
| Is this scale clinically relevant for evaluating hemostasis in clinical studies? |  |  |
| Yes | 25 | 100 |
| No | 0 | 0 |
| Does the bleeding scale use non-overlapping terms? |  |  |
| Yes | 18 | 72 |
| No, and it prevents me from using this scale | 1 | 4 |
| No, but it does not prevent use | 6 | 24 |
| Does the bleeding scale represent the range of bleeding site sizes and severities expected in your clinical practice? |  |  |
| Yes | 22 | 88 |
| No | 3 | 12 |
| Does the bleeding scale use objective terms? |  |  |
| Yes | 23 | 92 |
| No, and it prevents me from using this scale | 0 | 0 |
| No, but it does not prevent use | 2 | 8 |
| How self-explanatory is the bleeding scale? |  |  |
| Very | 11 | 44 |
| Mostly | 13 | 52 |
| Not really | 1 | 4 |
| Not at all | 0 | 0 |
| Did you use visual presentation of blood loss (e.g. ooze, intermittent flow, controllable spurting, etc.) to grade the videos? |  |  |
| Yes | 25 | 100 |
| No | 0 | 0 |
| Did you use anatomical appearance (e.g. capillary-like, venule-like, arterial-like, etc.) to grade the videos? |  |  |
| Yes | 17 | 68 |
| No | 8 | 32 |
| Did you use qualitative descriptions of bleeding (e.g. mild, moderate, severe, etc.) to grade the videos? |  |  |
| Yes | 20 | 80 |
| No | 5 | 20 |
| Did you use visually estimated rate of blood loss to grade the videos? |  |  |
| Yes | 16 | 64 |
| No | 9 | 36 |
| Which description is the most relevant to you? |  |  |
| Anatomical appearance | 2 | 8 |
| Qualitative description | 1 | 4 |
| Visual presentation | 14 | 56 |
| Visually estimated rate of blood loss | 8 | 32 |
| Which description is the least relevant to you? |  |  |
| Anatomical Appearance | 6 | 24 |
| Qualitative Description | 7 | 28 |
| Visual presentation | 3 | 12 |
| Visually estimated rate of blood loss | 9 | 36 |
| Would you be able to apply this bleeding scale to minimally invasive surgery? |  |  |
| Yes, as is | 9 | 36 |
| Yes, with modifications | 12 | 48 |
| No | 3 | 12 |
| N/A (I don't do MIS) | 1 | 4 |
| Is this scale relevant for evaluating intraoperative hemostasis? |  |  |
| Yes, as is | 18 | 72 |
| Yes, with modifications | 6 | 24 |
| No | 1 | 4 |
| Do you think the scale can be used to describe intraoperative bleeding when communicating with… |  |  |
| Other Surgeons, | 1 | 4 |
| Anesthesiologists, | 2 | 8 |
| Other Surgeons, Surgical Physician Assistants, | 1 | 4 |
| Other Surgeons, Surgical Physician Assistants, Anesthesiologists, | 1 | 4 |
| Other Surgeons, Surgical Physician Assistants, Registered Nurses, | 1 | 4 |
| Other Surgeons, Anesthesiologists, Industry Representatives, | 1 | 4 |
| Other Surgeons, Surgical Physician Assistants, Registered Nurses, Anesthesiologists | 5 | 20 |
| Other Surgeons, Surgical Physician Assistants, Registered Nurses, Industry Representatives | 1 | 4 |
| Other Surgeons, Surgical Physician Assistants, Anesthesiologists, Industry Representatives | 1 | 4 |
| Other Surgeons, Surgical Physician Assistants, Registered Nurses, Anesthesiologists, Industry Representatives | 11 | 44 |
| Can this scale help to differentiate hemostatic agents? |  |  |
| Yes | 24 | 96 |
| No | 1 | 4 |
| Do you have interest in participating in future clinical studies investigating hemostatic agents? |  |  |
| Yes | 24 | 96 |
| No | 1 | 4 |
